# Supplementary material for: Real-world data about emotional stress, disability and need for social care in a German IBD patient cohort
Source: PLoS One. 2020 Jan 3;15(1):e0227309. doi: 10.1371/journal.pone.0227309 (PMC6941800; doi:10.1371/journal.pone.0227309)
Supplement: S1 Table — Results of the subsections of the online survey focused on emotional stress in daily life. (ODT) [file pone.0227309.s002.odt]

S1 Table. Emotional stress in daily life

Entire IBD cohort


N=505
Ulcerative colitis


N=156
Crohn’s disease


N=335
p-Value
Emotional stress: Daily life 
6 months, mean (SD)


1. Stress daily life
3,41 (1.027)
3.42 (1.060)
3.42 (1.003)
0.719
2. Everyday household chores
2.84 (1.198)
2.74 (1.095)
2.89  (1.241)
0.228
3. Body hygiene
2.02 (1.154)
1.95 (1.157)
2.05 (1.143)
0.252
4. Not finding a toilet in time
3.43 (1.346)
3.54 (1.346)
3.38 (1.336)
0.180
5. Social activities
3.28 (1.209)
3.28 (1.200)
3.28 (1.200)
0.997
6. Sports
3.48 (1.231)
3.46 (1.220)
3.50 (1.230)
0.730
7. Family activities/events
2.84 (1.192)
 2.78 (1.171)
2.87 (1.197)
0.450
8. General exhaustion
3.86 (1.062)
3.87 (1.066)
3.87 (1.056)
0.951
9. Meeting new people
2.94 (1.354)
3.02 (1.407)
2.91 (1.324)
0.361
10. Finding a new partner
2.90 (1.416)
2.95 (1.463)
2.90 (1.387)
0.739
11. Romantic relationship
2.81 (1.265)
2.85 (1.335)
2.79 (1.231)
0.707
12. Sex life
3.11 (1.290)
3.10 (1.309)
3.13 (1.275)
0.830
13. Self-care
2.95 (1.205)
2.94 (1.184)
2.97 (1.205)
0.927
14. Planning a vacation
3.46 (1.295)
3.15 (1.250)
3.43 (1.275)
0.260
Emotional stress: Daily life
5 years, mean (SD)


1. Stress daily life 
3.68 (1.034)
3.76 (1.036)
3.64 (1.033)
0.222
2. Everyday household chores
3.66 (1.039)
3.68 (1.065)
3.65 (1.029)
0.653
3. Body hygiene
3.11 (1.247)
3.13 (1.241)
3.10 (1.241)
0.847
4. Not finding a toilet in time
2.45 (1.335)
2.41 (1.334)
2.47 (1.323)
0.625
5. Social activities
3.66 (1.254)
3.82 (1.208)
3.57 (1.265)
0.039
6. Sports
3.50 (1.180)
3.57 (1.166)
3.45 (1.183)
0.317
7. Family activities/events
3.65 (1.177)
3.64 (1.154)
3.67 (1.177)
0.711
8. General exhaustion
3.11 (1.275)
3.14 (1.277)
3.09 (1.273)
0.687
9. Meeting new people
3.89  (1.116)
3.88 (1.085)
3.90 (1.118)
0.712
10. Finding a new partner
3.01 (1.338)
3.13 (1.326)
2.96 (1.333)
0.175
11. Romantic relationship
2.98 (1.358)
3.11 (1.367)
2.93 (1.334)
0.164
12. Sex life
3.03 (1.286)
3.13 (1.232)
2.98 (1.300)
0.236
13. Self-care
3.20 (1.264)
3.25 (1.272)
3.19 (1.255)
0.627
14. Planning a vacation
3.18 (1.258)
3.22 (1.267)
3.15 (1.250)
0.542
S1 Table Results of the subsections of the online survey focused on emotional stress in daily life.
