# Supplementary material for: Real-world data about emotional stress, disability and need for social care in a German IBD patient cohort
Source: PLoS One. 2020 Jan 3;15(1):e0227309. doi: 10.1371/journal.pone.0227309 (PMC6941800; doi:10.1371/journal.pone.0227309)
Supplement: S2 Table — Results of the subsections of the online survey focused on emotional stress at work. (ODT) [file pone.0227309.s003.odt]

S2 Table. Emotional stress at work


Entire IBD cohort


N=505
Ulcerative colitis


N=156
Crohn’s disease


N=335
p-Value
Stress at work: 6 months, mean (SD)


1. General stress at work 
3.43 (1.365)
3.58 (1.312)
3.36 (1.381)
0.102
2. Way to work
3.25 (1.333)
3.31 (1.301)
3.23 (1.338)
0.556
3. Not finding a toilet in time
2.79 (1.505)
3.02 (1.480)
2.69 (1.508)
0.030
4. Working with colleagues
3.46 (1.556)
3.47 (1.487)
3.45 (1.580)
0.914
5. Workflow
2.51 (1.319)
2.65 (1.240)
2.44 (1.339)
0.106
6. Coordinating work schedule
2.60 (1.311)
2.69 (1.291)
2.54 (1.298)
0.293
7. Spontaneous situations
2.65 (1.388)
 2.71 (1.278)
2.62 (1.427)
0.562
Stress at work: 5 years, mean (SD)


1. General stress at work 
3.24 (1.366)
3.31 (1.323)
3.22 (1.376)
0.551
2. Way to work
3.44 (1.343)
3.53 (1.260)
3.44 (1.354)
0.544
3. Not finding a toilet in time
3.01 (1.481)
3.26 (1.426)
3.00 (1.489)
0.078
4. Working with colleagues
3.52 (1.487)
3.64 (1.439)
3.46 (1.502)
0.252
5. Workflow
2.72 (1.373)
2.81 (1.364)
2.70 (1.362)
0.463
6. Coordinating work schedule
2.82 (1.347)
2.89 (1.316)
2.81 (1.347)
0.580
7. Spontaneous situations
2.91 (1.401)
2.98 (1.378)
2.90 (1.397)
0.594
S2 Table Results of the subsections of the online survey focused on emotional stress at work.
